# Supplementary material for: Pronounced effect of yttrium oxide on the activity of Pd/rGO electrocatalyst for formic acid oxidation reaction
Source: Royal Society of Chemistry journal article supplement (doi:10.1039/d3ra01929b), 2023-01-01
Supplement: d3ra01929b1.pdf [file d3ra01929b1.pdf]

## **Pronounced effect of yttrium oxide on the activity of Pd/rGO electrocatalyst for formic acid oxidation reaction**

Muhammad Sofian,<sup>1</sup> Fatima Nasim,<sup>1</sup> Hassan Ali,<sup>1\*</sup> Muhammad Arif Nadeem<sup>1,2\*</sup>

<sup>1</sup>Catalysis and Nanomaterials Lab 27, Department of Chemistry, Quaid-i-Azam University, Islamabad 45320, Pakistan

<sup>2</sup>Pakistan Academy of Sciences, 3-Constitution Avenue Sector G-5/2, Islamabad, Pakistan.

\*Contact details:

M.A.N; [manadeem@qau.edu.pk](mailto:manadeem@qau.edu.pk);

H.A.; [hassanali471@gmail.com](mailto:hassanali471@gmail.com)

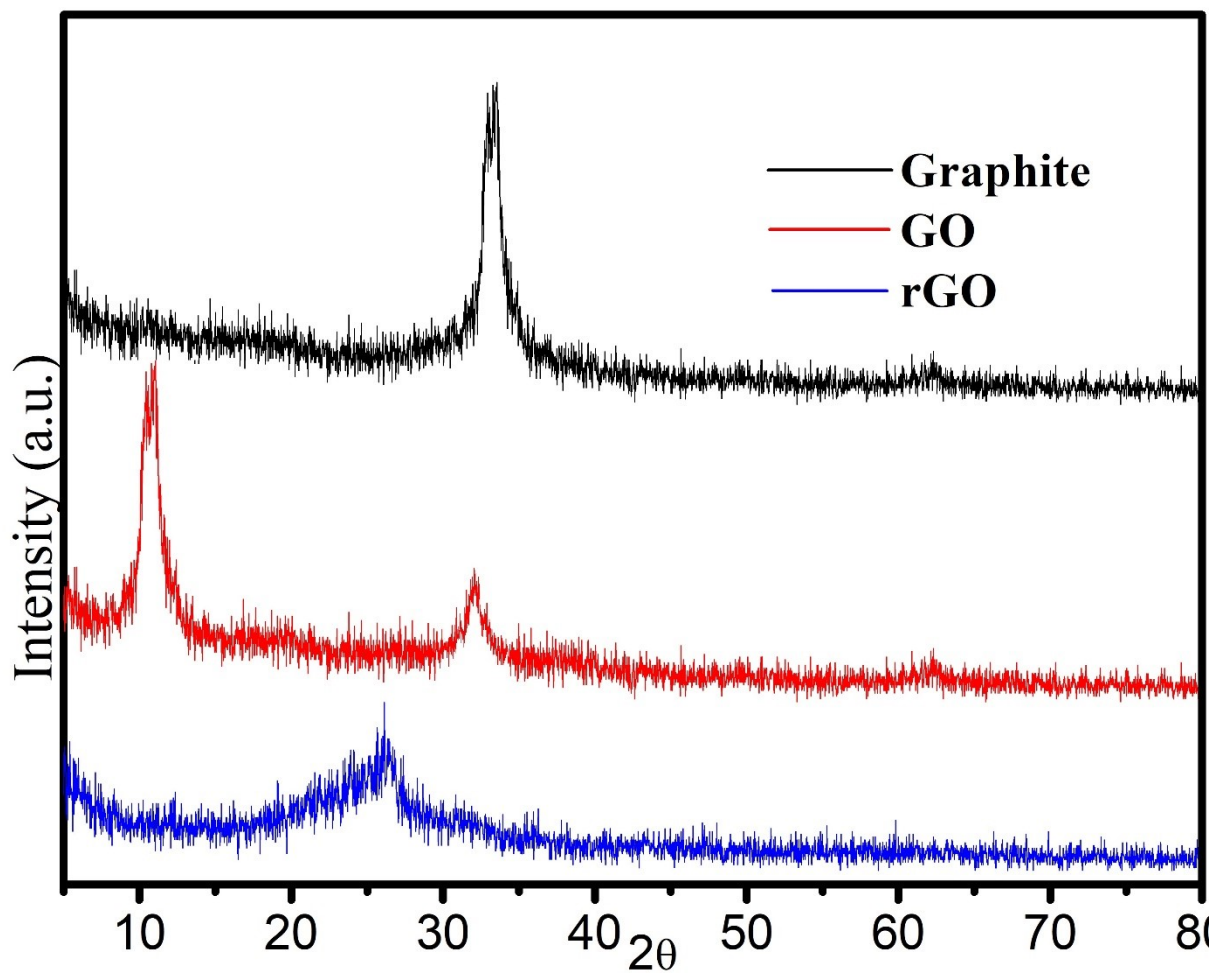

**Figure S1.** PXRD pattern of graphite, graphene oxide (GO) and reduced graphene oxide (rGO)

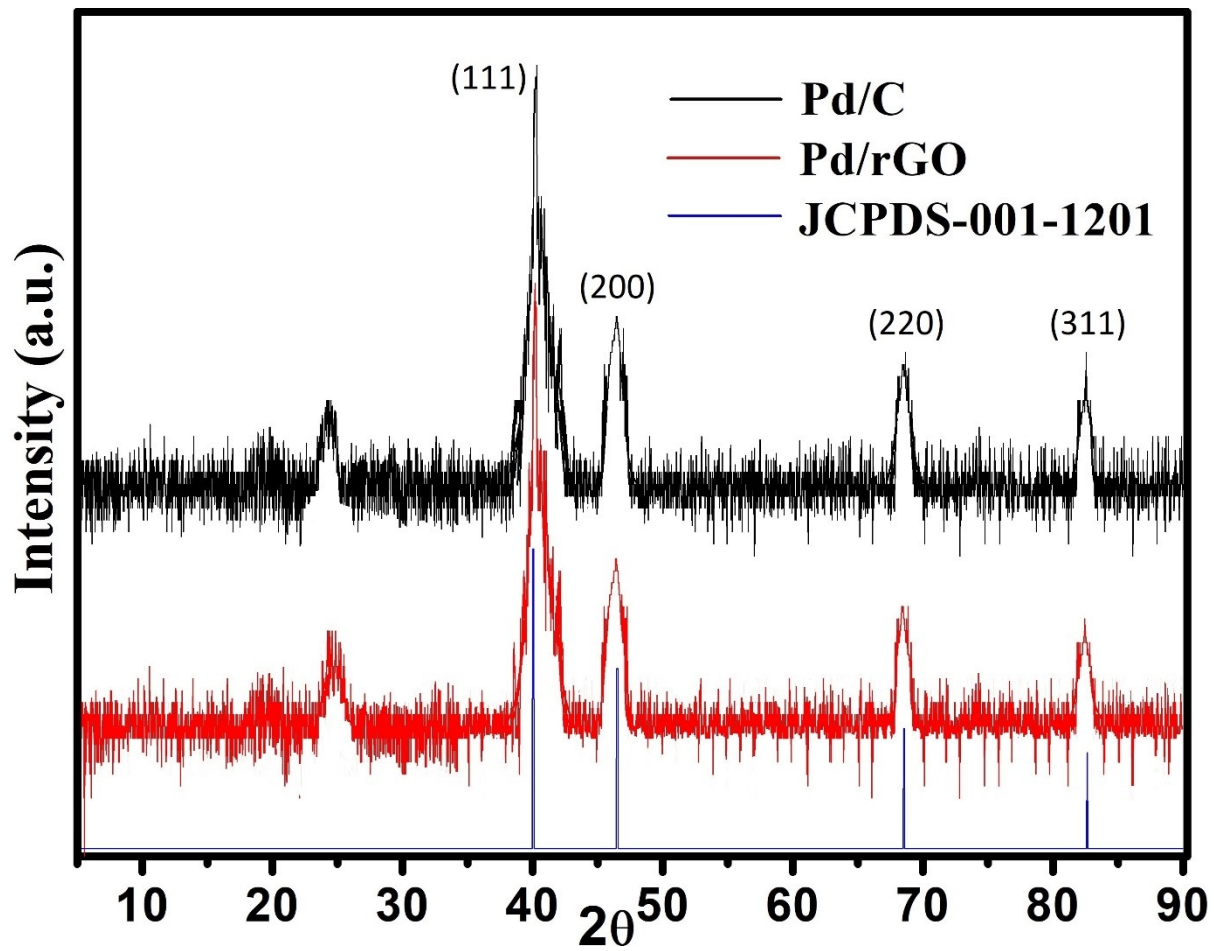

Figure S2. PXRD pattern of Pd with reference catalysts (Pd/rGO and Pd/C)

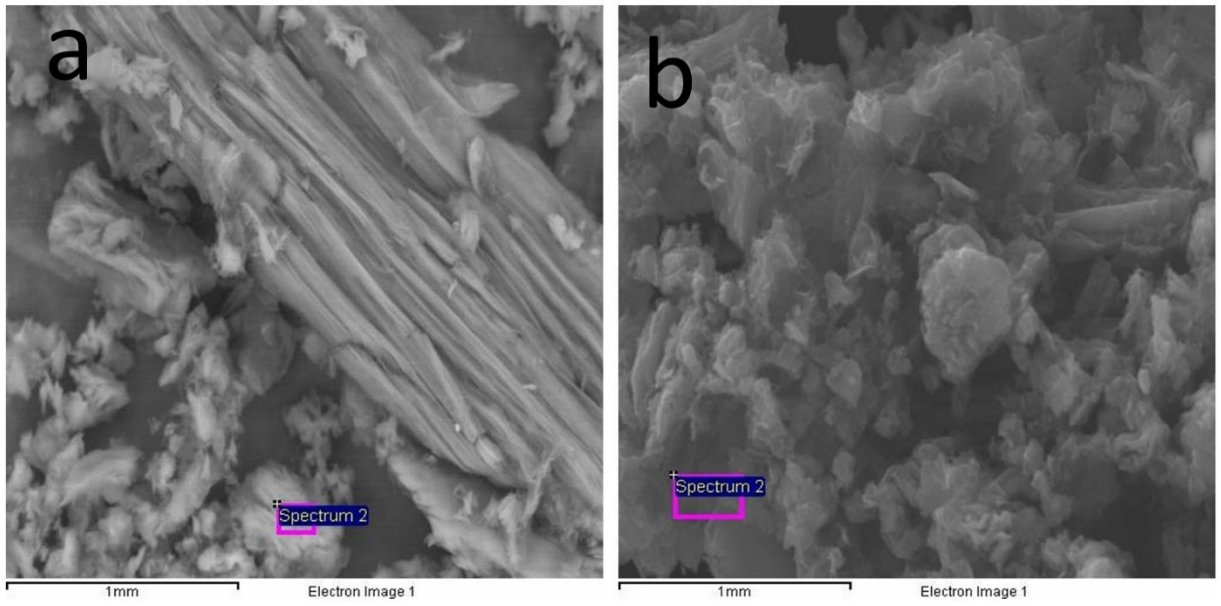

**Figure S3.** SEM Images of rGO (a) layered view (b) surface view

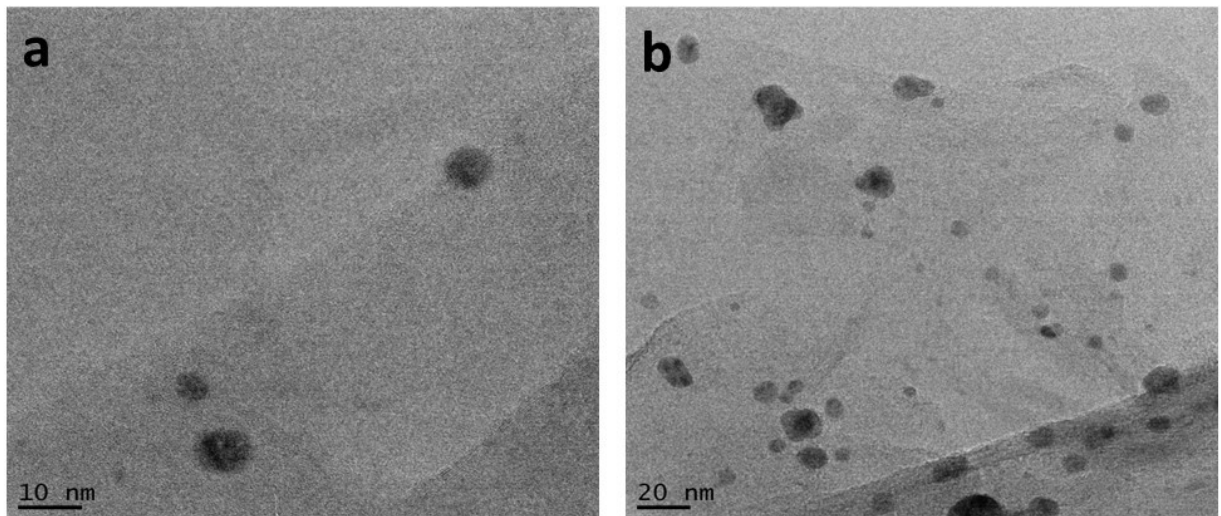

**Figure S4.** TEM of Pd<sub>6</sub>Y<sub>4</sub>/rGO at 10 and 20 nm

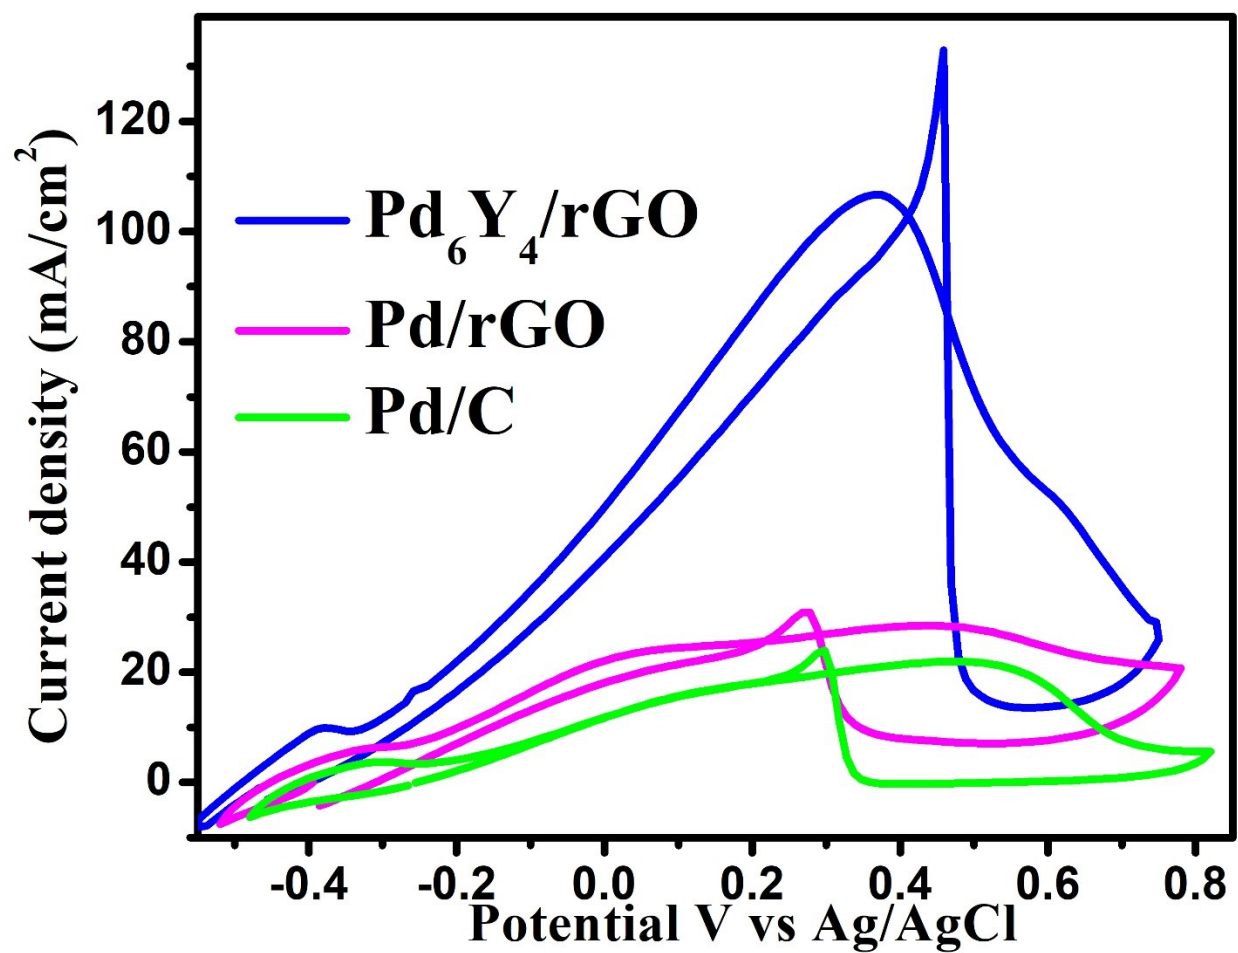

Figure S5. Current density of Pd<sub>6</sub>Y<sub>4</sub>/rGO and reference catalysts (Pd/rGO and Pd/C)

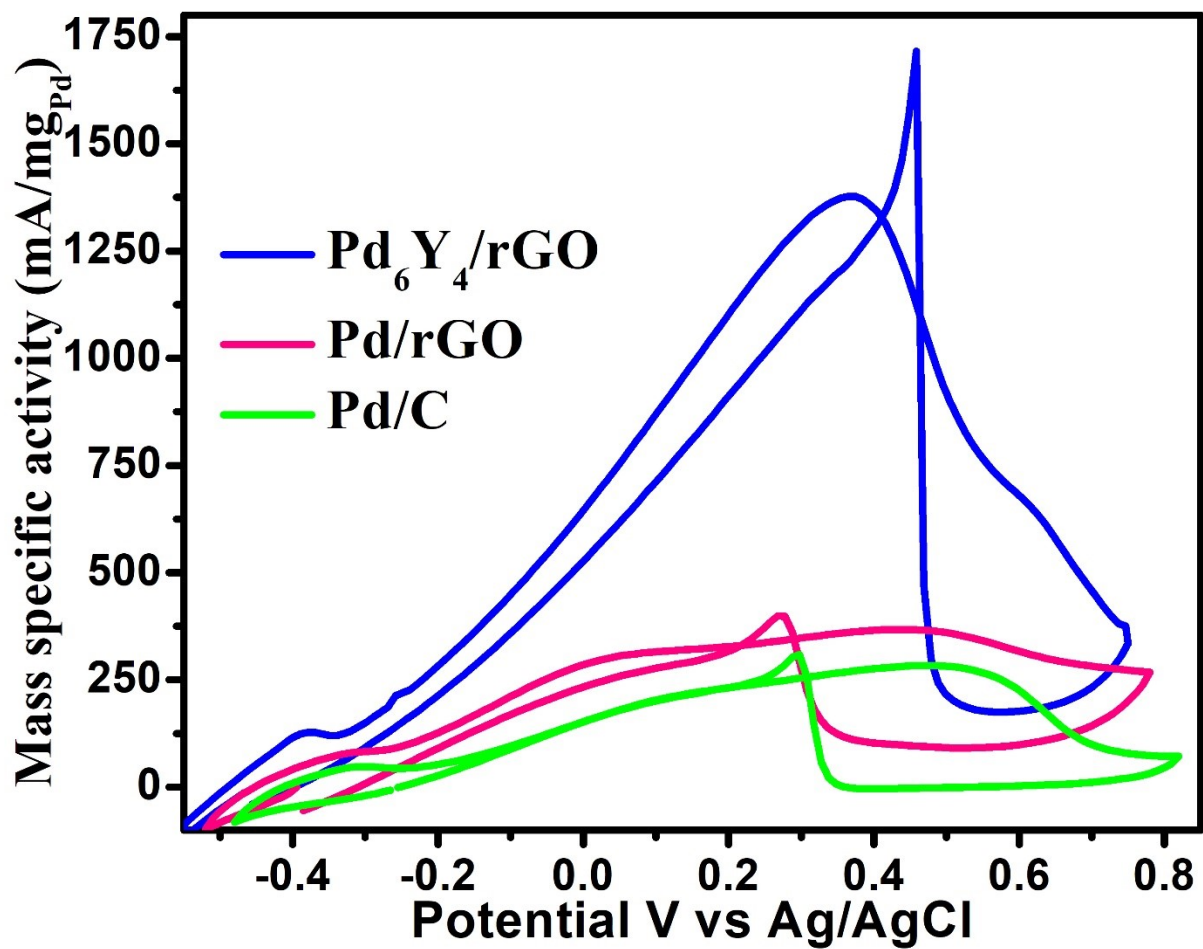

Figure S6. Mass specific activity of Pd<sub>6</sub>Y<sub>4</sub>/rGO and reference catalysts (Pd/rGO and Pd/C)

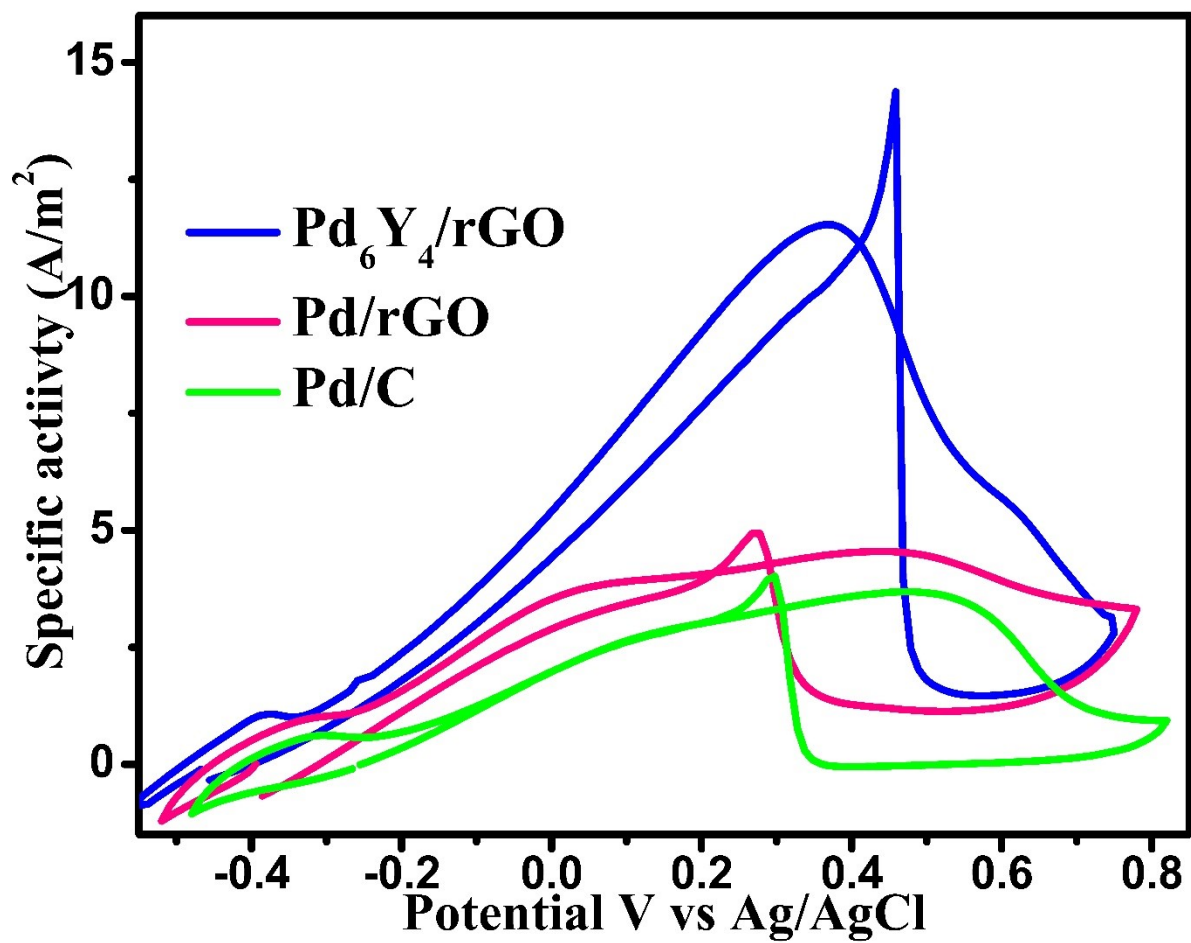

Figure S7. Specific activity of Pd<sub>6</sub>Y<sub>4</sub>/rGO and reference catalysts (Pd/rGO and Pd/C)

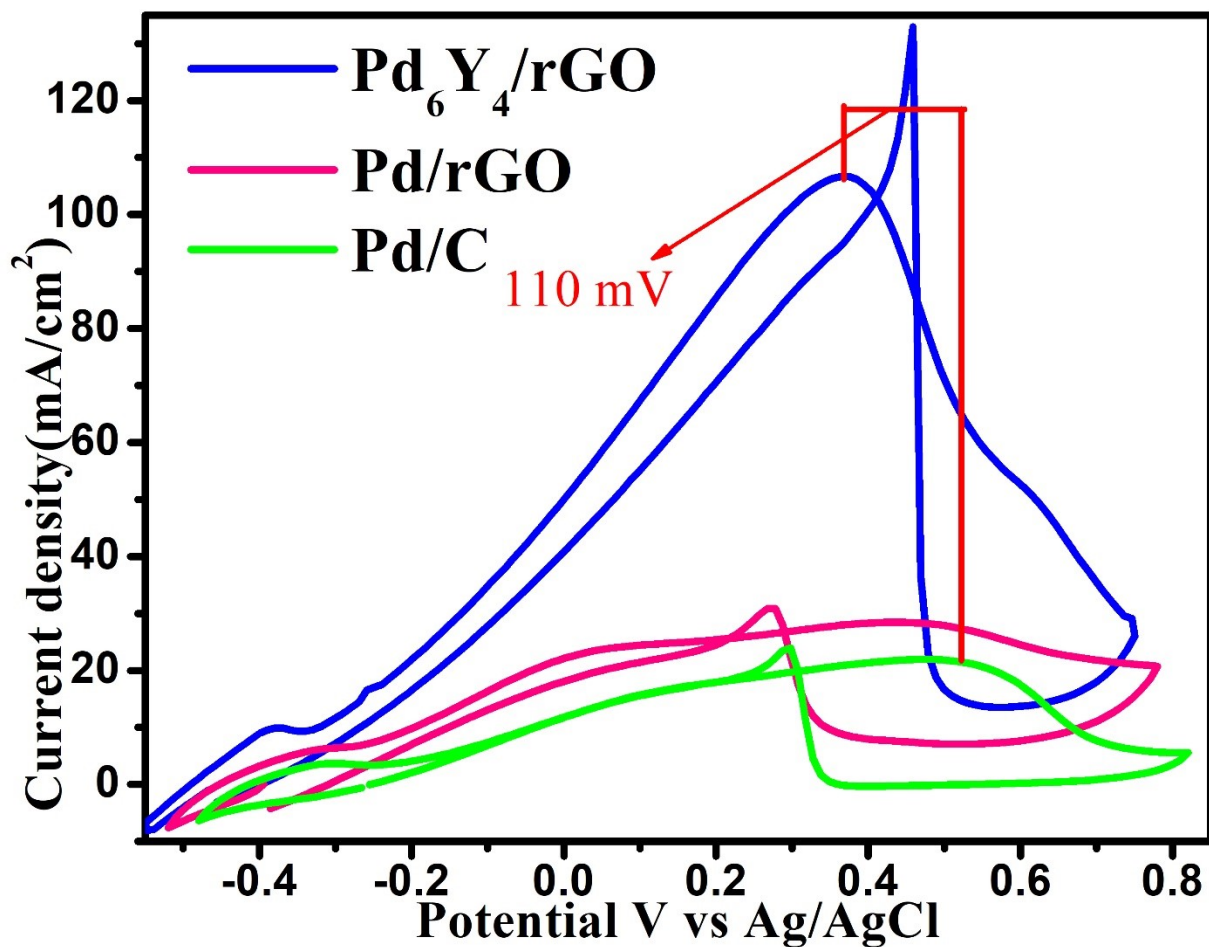

Figure S8. Shift of oxidation peak potential of Pd<sub>6</sub>Y<sub>4</sub>/rGO in comparison to reference catalysts (Pd/rGO and Pd/C)



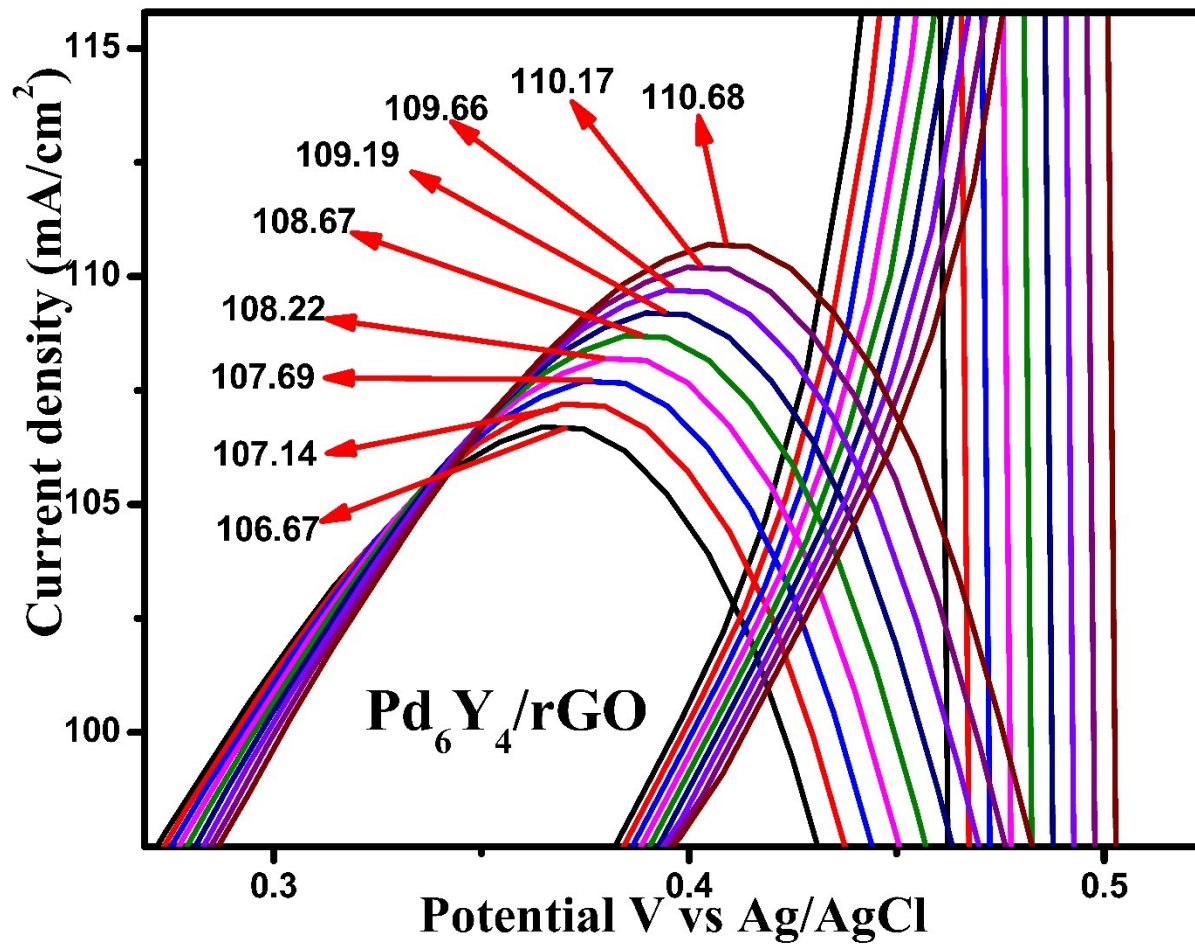

Figure S9. Current density relation of  $\text{Pd}_6\text{Y}_4/\text{rGO}$  with scan rate

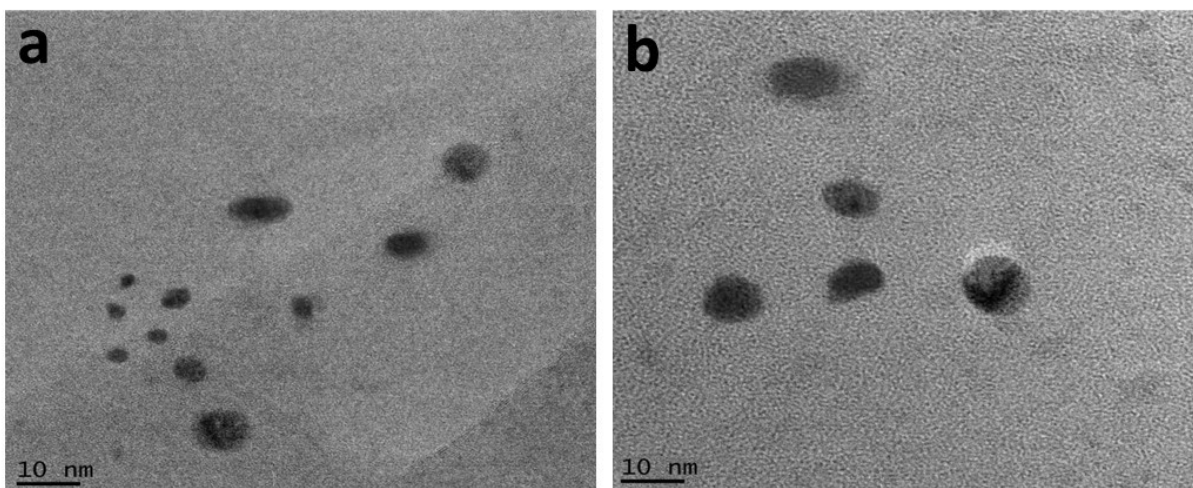

**Figure S10.** TEM image of (a) Pd<sub>2</sub>Y<sub>8</sub>/rGO (b) Pd<sub>4</sub>Y<sub>6</sub>/rGO

**Table S1.** Comparison of various electrochemical parameters of synthesized materials

| <b>Catalyst</b>                        | <b>ECSA<br/>(m<sup>2</sup>/g)</b> | <b>E<sub>f</sub><br/>(V)</b> | <b>E<sub>b</sub>(V)</b> | <b>j<sub>f</sub><br/>(mA/cm<sup>2</sup>)</b> | <b>j<sub>b</sub><br/>(mA/cm<sup>2</sup>)</b> | <b>MSA<br/>(mA/mg<br/>Pd)</b> | <b>SA<br/>(A/m<sup>2</sup>)</b> | <b>R<sub>ct</sub><br/>(Ω)</b> |
|----------------------------------------|-----------------------------------|------------------------------|-------------------------|----------------------------------------------|----------------------------------------------|-------------------------------|---------------------------------|-------------------------------|
| <b>Pd<sub>6</sub>Y<sub>4</sub>/rGO</b> | 119.4                             | 0.36                         | 0.45                    | 106.60                                       | 132.54                                       | 1380                          | 11.55                           | 135.55                        |
| <b>Pd<sub>4</sub>Y<sub>6</sub>/rGO</b> | 107.73                            | 0.38                         | 0.40                    | 73.02                                        | 79.79                                        | 939.32                        | 8.63                            | 169                           |
| <b>Pd<sub>2</sub>Y<sub>8</sub>/rGO</b> | 96.05                             | 0.41                         | 0.69                    | 32.48                                        | 44.31                                        | 410.84                        | 4.3                             | 211                           |
| <b>Pd/rGO</b>                          | 80.78                             | 0.43                         | 0.27                    | 28.36                                        | 30.67                                        | 368.16                        | 4.5                             | 251                           |
| <b>Pd/C</b>                            | 76.88                             | 0.47                         | 0.29                    | 21.70                                        | 24.81                                        | 285.73                        | 3.6                             | 278                           |

**ECSA** = Electrochemical surface area from PdO reduction

**E<sub>f</sub>** = Forward oxidation potential

**E<sub>b</sub>** = Backward oxidation potential

**J<sub>f</sub>** = Forward current density

**J<sub>b</sub>** = Backward current density

**MSA** = Mass specific activity

**SA** = Specific activity

**R<sub>ct</sub>** = Resistance to charge transfer

**Table S2.** Calculated amount of each metal in all the synthesized electrocatalyst determined from

| Catalyst                            | Wt % of Pd | Wt % of Y |
|-------------------------------------|------------|-----------|
| Pd <sub>6</sub> Y <sub>4</sub> /rGO | 11.69      | 6.75      |
| Pd <sub>4</sub> Y <sub>6</sub> /rGO | 6.97       | 11.54     |
| Pd <sub>2</sub> Y <sub>8</sub> /rGO | 3.53       | 15.24     |

AAS (Atomic absorption spectroscopy)

**Table S3.** Optimum analytical conditions maintained for analysis of selected trace metals in the synthesized electrocatalysts using atomic absorption spectrophotometer

| Pd <sub>6</sub> Y <sub>4</sub> /rGO |                 |                  |                 |                            |                            |
|-------------------------------------|-----------------|------------------|-----------------|----------------------------|----------------------------|
| Metal                               | Wavelength (nm) | HCl current (mA) | Slit width (mm) | Fuel gas flow rate (L/min) | Detection ppm Limit (µg/L) |
| Pd                                  | 450             | 5.0              | 0.5             | 2.6                        | 2.97                       |
| Y                                   | 256             | 5.0              | 0.5             | 2.6                        | 1.94                       |
| Pd <sub>4</sub> Y <sub>6</sub> /rGO |                 |                  |                 |                            |                            |
| Pd                                  | 450             | 5.0              | 0.5             | 2.6                        | 1.95                       |
| Y                                   | 256             | 5.0              | 0.5             | 2.6                        | 2.95                       |
| Pd <sub>2</sub> Y <sub>8</sub> /rGO |                 |                  |                 |                            |                            |
| Pd                                  | 450             | 5.0              | 0.5             | 2.6                        | 0.98                       |
| Y                                   | 256             | 5.0              | 0.5             | 2.6                        | 3.96                       |

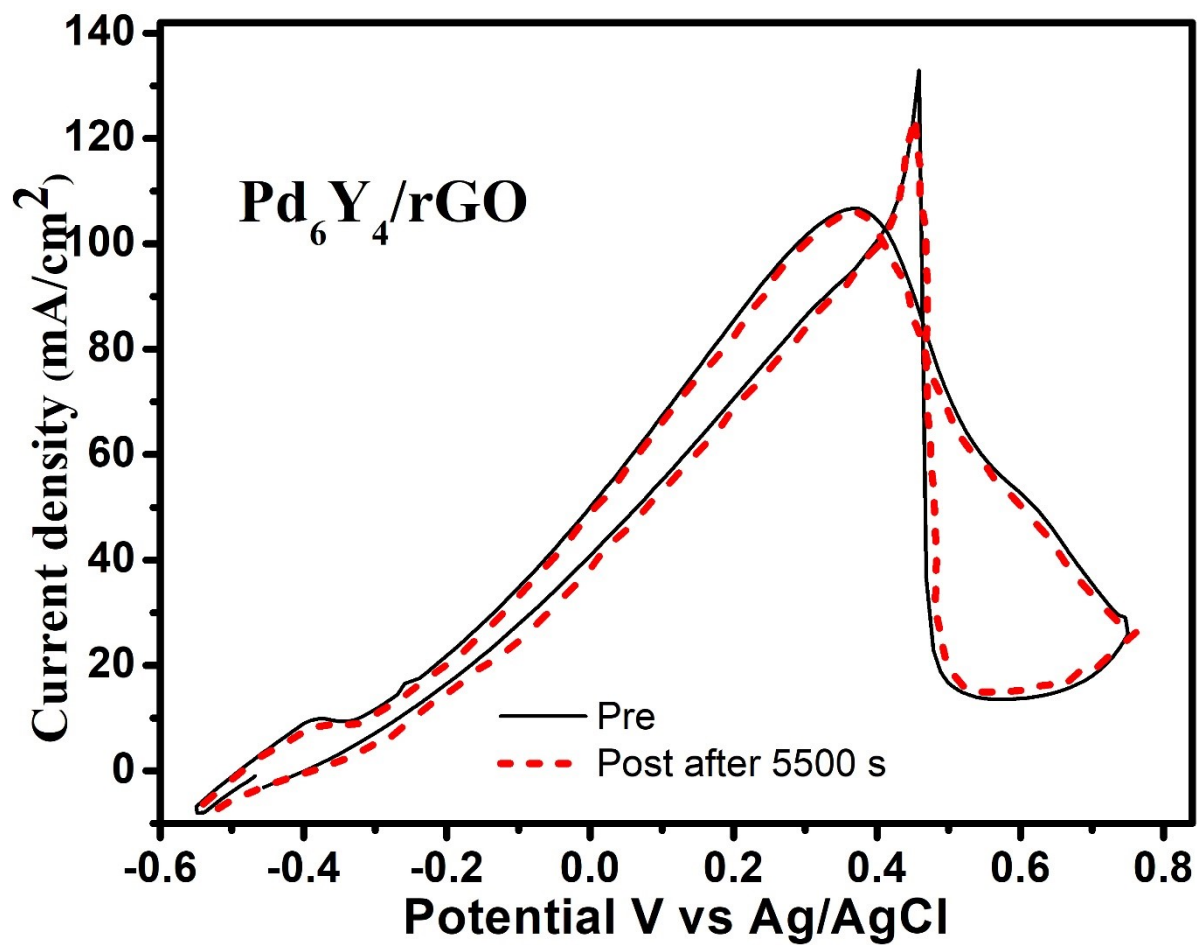

Figure S11: Pre and post CV of Pd<sub>6</sub>Y<sub>4</sub>/rGO

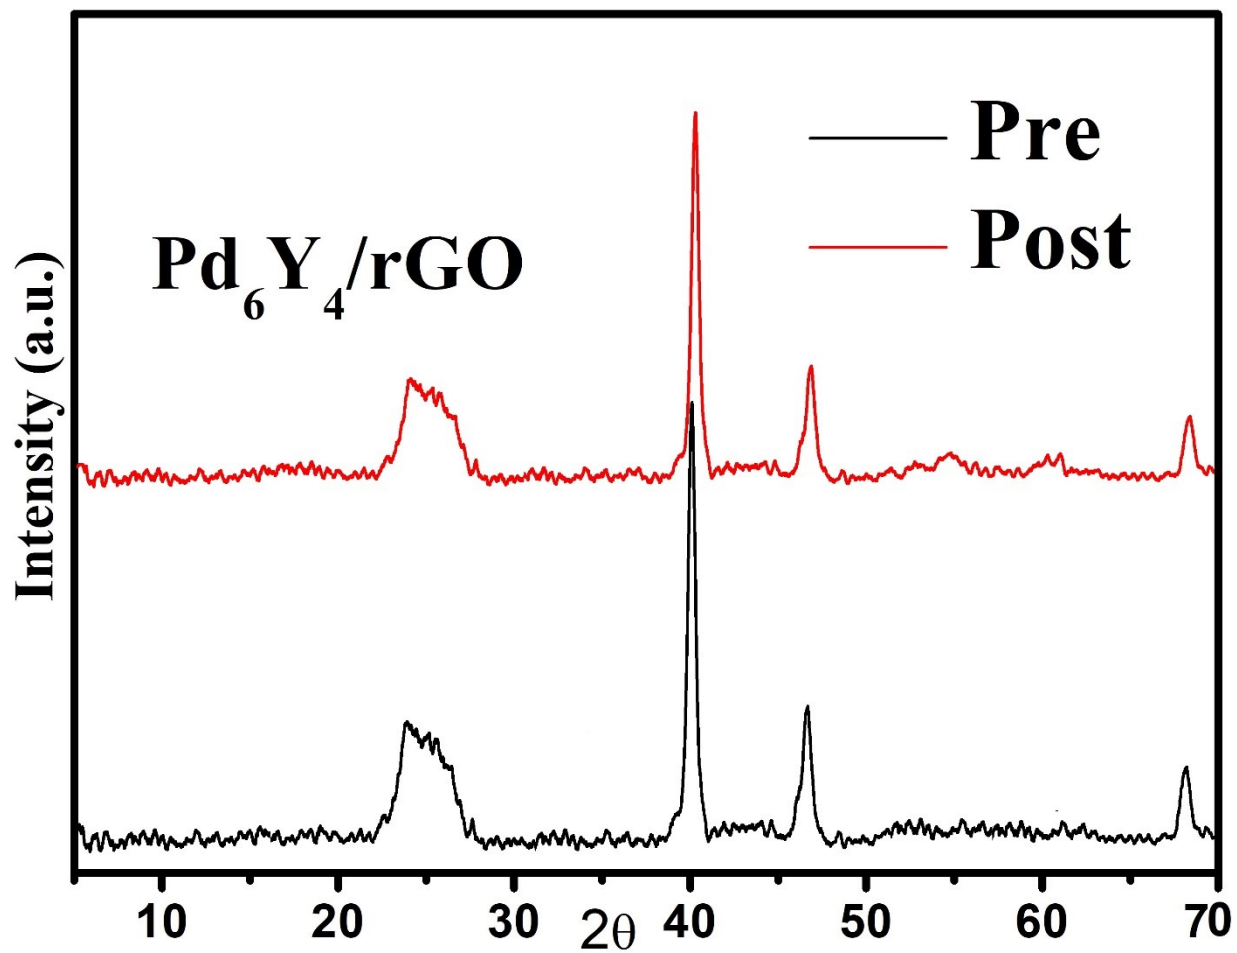

Figure S12: Post and pre PXRD pattern of  $\text{Pd}_6\text{Y}_4/\text{rGO}$

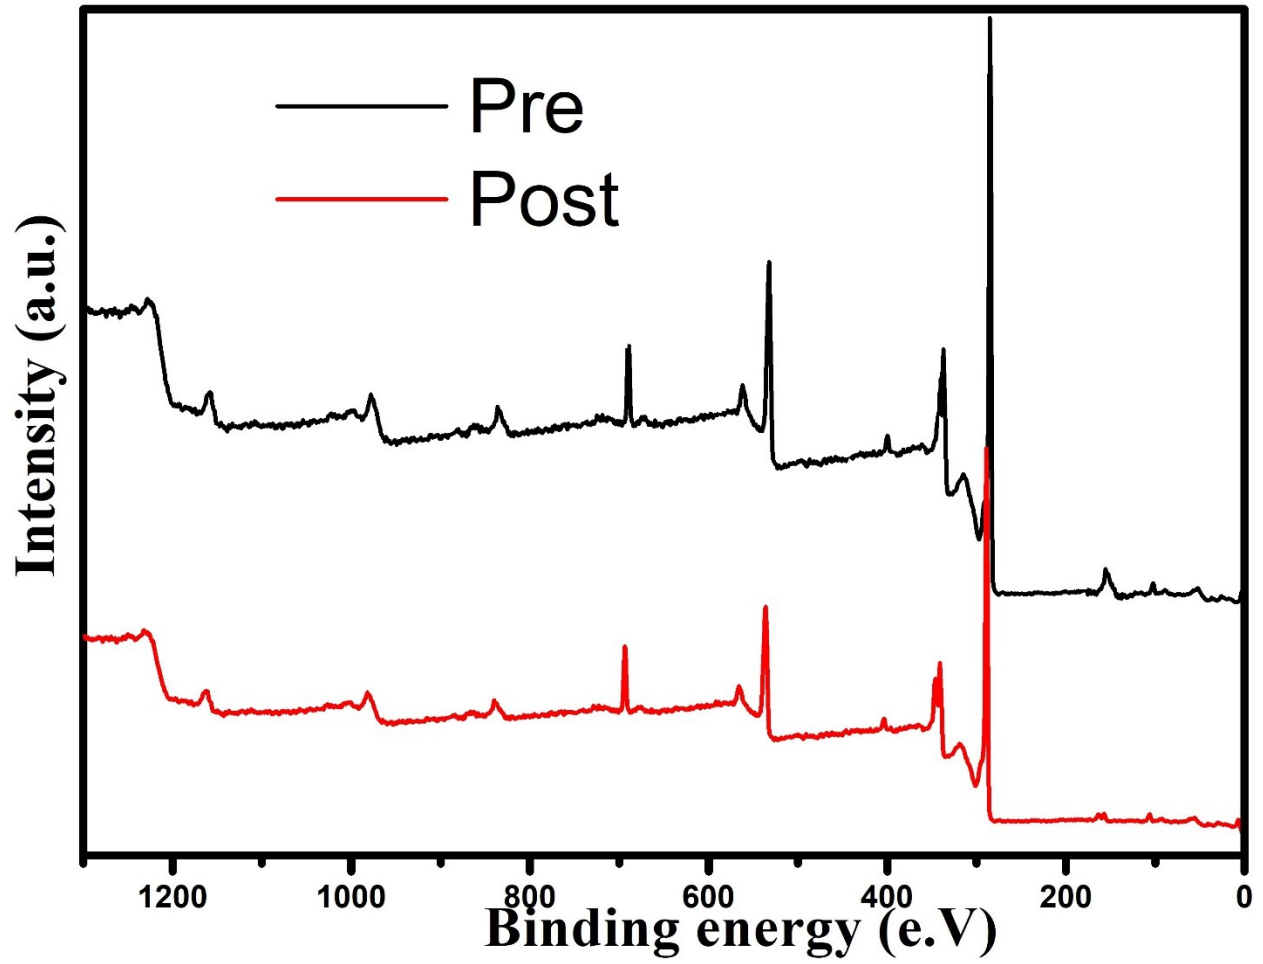

Figure S13: Pre and post XPS survey of Pd<sub>6</sub>Y<sub>4</sub>/rGO

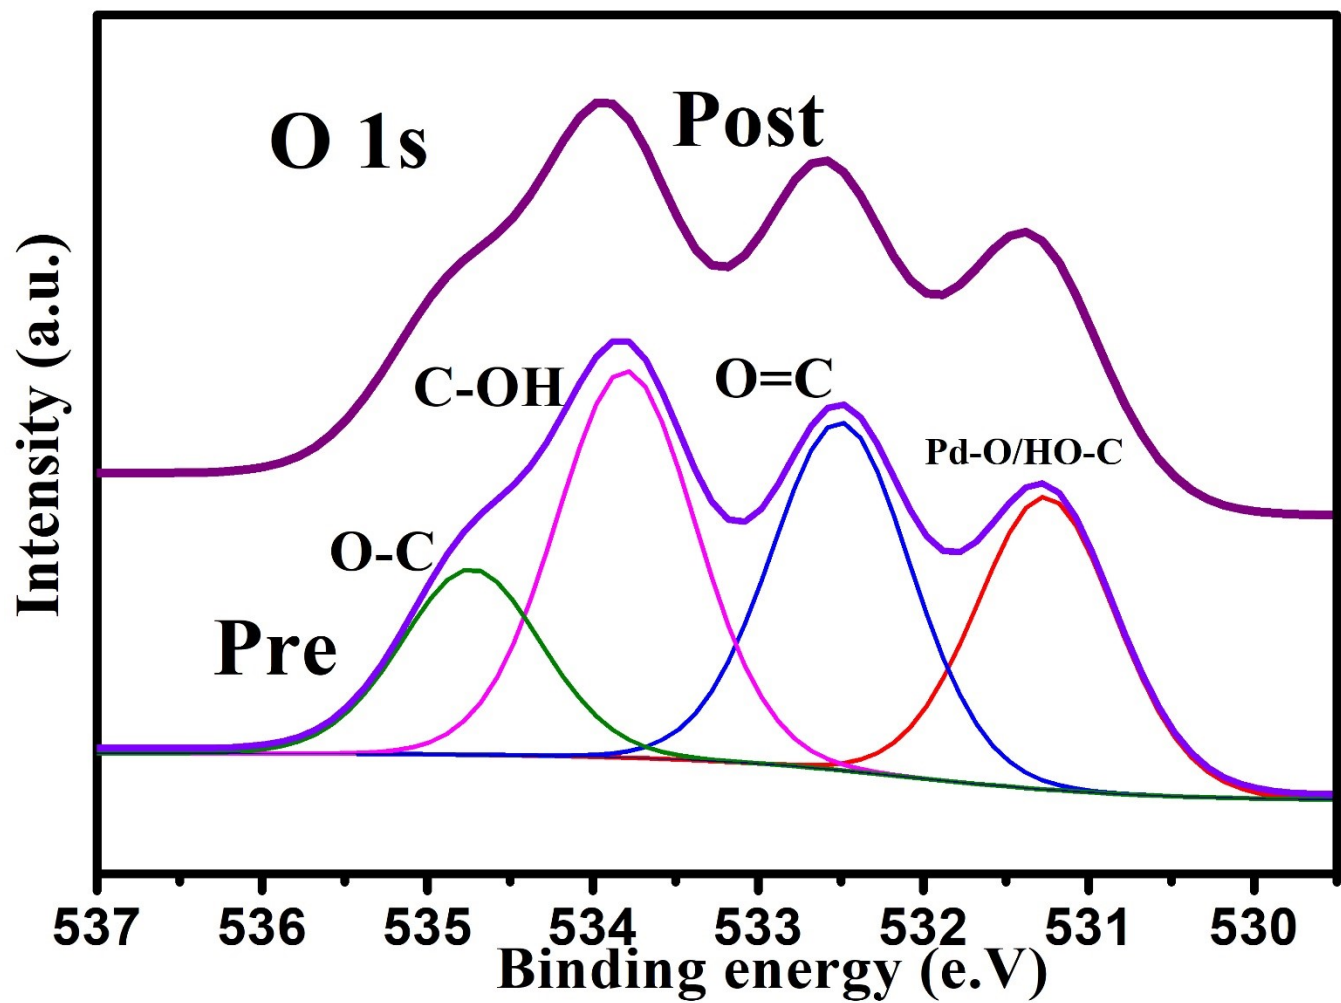

Figure S14: Pre and post XPS of O
